# Supplementary material for: Structural phase transition of BiSb and formation of Weyl semimetallic phase under pressure: calculations and experiments
Source: Royal Society of Chemistry journal article supplement (doi:10.1039/d1tc05939d), 2022-01-01
Supplement: d1tc05939d1.pdf [file d1tc05939d1.pdf]

## Supplementary Information

Structural phase transition of BiSb and formation of Weyl semimetallic phase under pressure: calculations and experiments

Bulk bandstructure is calculated with and without-SOC. Fig. S1(a-h) represent the calculated electronic bandstructure along the high symmetry lines of the hexagonal Brillouin zone. BiSb is an indirect semiconductor at atmospheric pressure in both with and without-SOC. The band gap is 0.119 eV with-SOC and less than 0.198 eV without-SOC. Moreover, due to the presence of SOC, each band of BiSb shows spin-splitting. At 4 GPa, the conduction band broadening is more obvious and the semi-metallic behavior is remarkable.

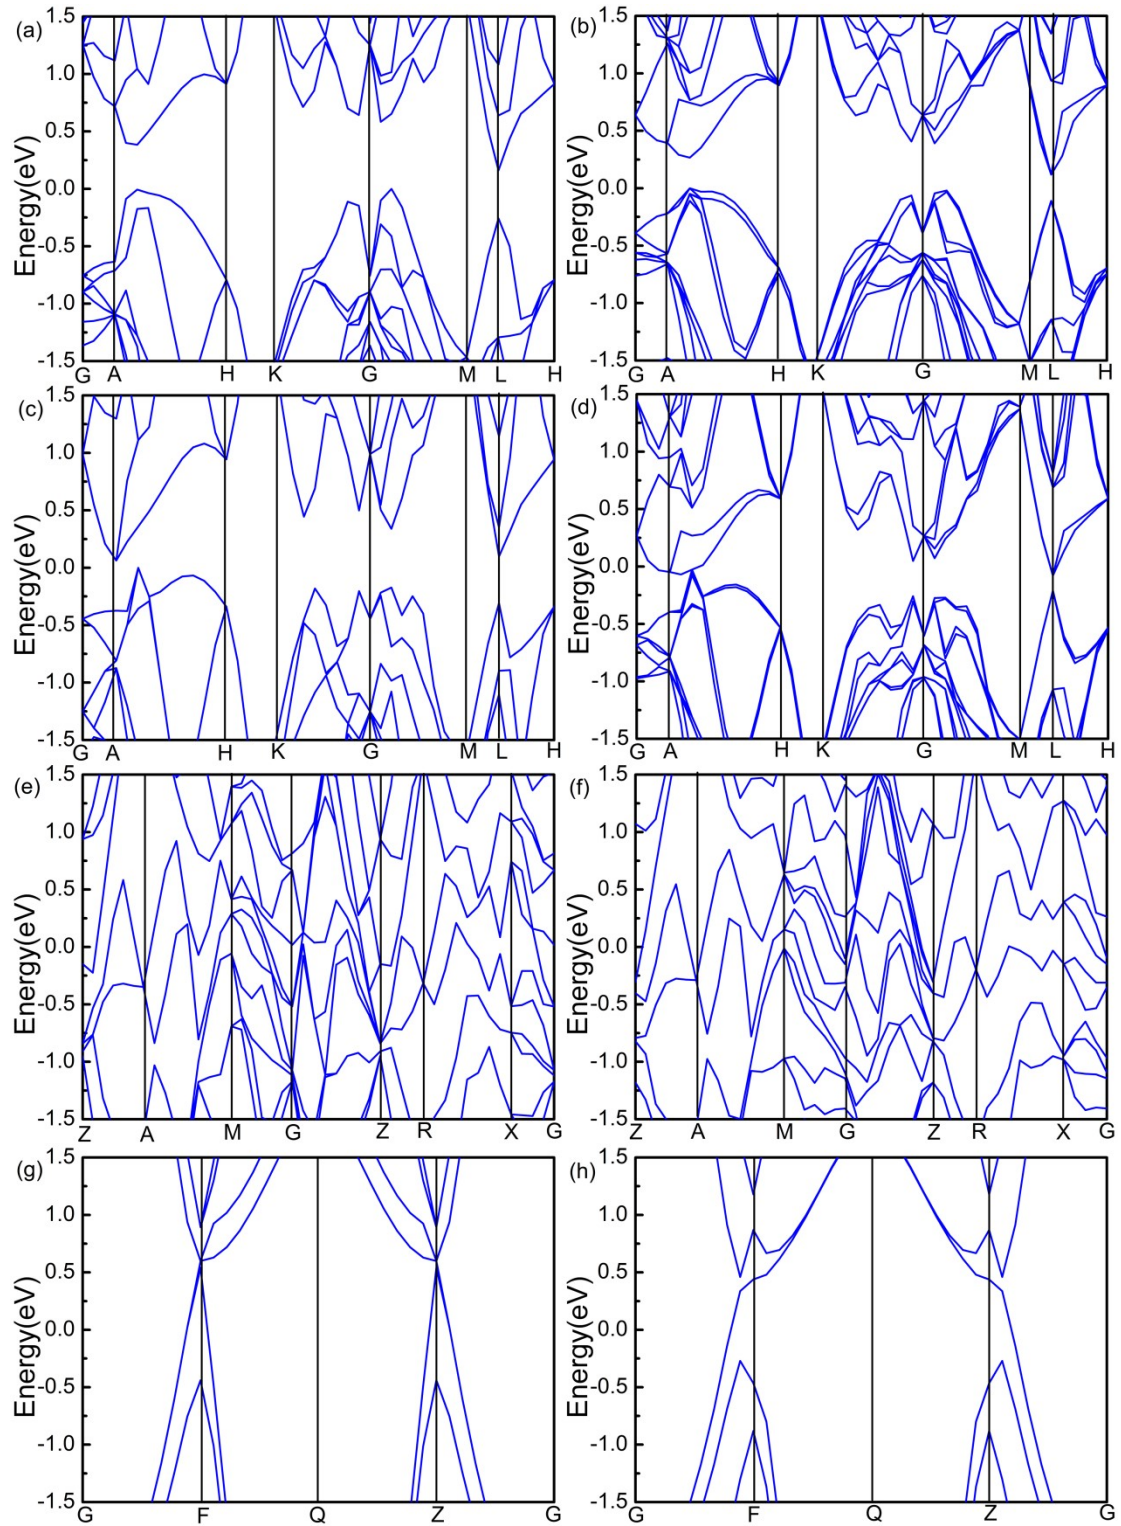

Fig. S1 Bandstructures (a,c,e and g) without-SOC and (b,d,f and h) with SOC are at 0 GPa, 4 GPa, 15 GPa and 25 GPa, respectively.

In order to further explore the bonding and estimate the amount of electrons on and between the participating atoms, we have performed Mulliken-population analysis. The calculated Mulliken charges are listed in Table S1 for all BiSb.

TABLE S1. Mulliken-population analysis for the BiSb at different pressures. The Mulliken charges are given in terms of  $e$ .

| BiSb   | Atom | Mulliken charges |
|--------|------|------------------|
| 0 GPa  | Sb   | 0.83             |
|        | Bi   | -0.84            |
| 4 GPa  | Sb   | -1.4             |
|        | Bi   | 1.4              |
| 15 GPa | Sb   | 1.27             |
|        | Bi   | -1.27            |
| 25 GPa | Sb   | 0.95             |
|        | Bi   | -0.97            |

The ability of Sb atoms to obtain electrons at 4 GPa is enhanced, indicating that the interlayer Bi-Sb interaction is enhanced, as observed in ELF.
